# Supplementary material
Source: HighWire-hosted journal article supplement (https://erj.ersjournals.com/content/55/2/1900753)
Supplement: inline-supplementary-material-1 [file inline-supplementary-material-1.pdf]

## Technical Standards for Oscillometry – Online Supplement

Gregory G. King<sup>1</sup>, Jason Bates<sup>2</sup>, Kenneth I. Berger<sup>3</sup>, Peter Calverley<sup>4</sup>, Pedro L. de Melo<sup>5</sup>, Raffaele L. Dellacà<sup>6</sup>, Ramon Farré<sup>7</sup>, Graham L. Hall<sup>8</sup>, Iulia Ioan<sup>9</sup>, Charlie Irvin<sup>2</sup>, David W. Kaczka<sup>10</sup>, David A. Kaminsky<sup>2</sup>, Hajime Kurosawa<sup>11</sup>, Enrico Lombardi<sup>12</sup>, Geoffrey N. Maksym<sup>13</sup>, François Marchal<sup>9</sup>, Beno W. Oppenheimer<sup>3</sup>, Shannon J. Simpson<sup>8</sup>, Cindy Thamrin<sup>1</sup>, Maarten van den Berge<sup>14</sup> and Ellie Oostveen<sup>15</sup>.

1. The Department of Respiratory Medicine and Airway Physiology and Imaging Group, Royal North Shore Hospital and The Woolcock Institute of Medical Research, The University of Sydney NSW 2006, Australia.
2. Department of Medicine, Pulmonary/Critical Care Division, University of Vermont, Larner College of Medicine, Burlington, Vermont, USA.
3. Division of Pulmonary, Critical Care, and Sleep Medicine, NYU School of Medicine and André Cournand Pulmonary Physiology Laboratory, Bellevue Hospital, New York, USA.
4. Institute of Ageing and Chronic Disease, University of Liverpool, Liverpool, UK.
5. Institute of Biology and Faculty of Engineering, Department of Physiology, Biomedical Instrumentation Laboratory, State University of Rio de Janeiro, Rio de Janeiro, Brazil.
6. Dipartimento di Elettronica, Informazione e Bioingegneria – DEIB, Politecnico di Milano University, Milano, Italy.
7. Unitat de Biofísica i Bioenginyeria, Facultat de Medicina, Universitat de Barcelona-IDIBAPS, Barcelona, Spain and CIBER de Enfermedades Respiratorias, Madrid, Spain.
8. Children's Lung Health, Telethon Kids Institute; School of Physiotherapy and Exercise Science, Curtin University, Perth WA, Australia.
9. Department of Pediatric Lung Function Testing, Children's Hospital, Vandoeuvre-lès-Nancy, France; EA 3450 DevAH – Laboratory of Physiology, Faculty of Medicine, University of Lorraine, Vandoeuvre-lès-Nancy, France
10. Departments of Anesthesia, Biomedical Engineering and Radiology, University of Iowa, Iowa City, Iowa, USA.
11. Department of Occupational Health, Tohoku University School of Medicine, Sendai, Japan

12. Pediatric Pulmonary Unit, Meyer Pediatric University Hospital, Florence, Italy.
13. School of Biomedical Engineering, Dalhousie University, Halifax, NS B3H 4R2, Canada.
14. University of Groningen, University Medical Center Groningen, Department of Pulmonary Diseases, Groningen, The Netherlands
15. Department of Respiratory Medicine, Antwerp University Hospital and University of Antwerp, Belgium.

### **Section E1. Estimation of impedance from flow and pressure raw data**

There are several approaches for estimating  $Z_{rs}$  from flow and pressure signals[1-5]. The most common one is based on the calculation of  $Z_{rs}$  as the ratio between the estimated cross-spectrum between flow and pressure signals and the estimated auto-spectrum of the flow signal[6]. With this method, the entire recording of pressure and flow signals is divided into smaller data segments made of a predefined number of data points. Each segment is eventually multiplied by a function that varies from 0 at the beginning of the segment, increases to 1 in the center, and gets back to 0 at the end of the segment (a procedure called windowing). The estimation of  $Z_{rs}$  spectra can then be obtained by averaging periodograms computed by using the Fast Fourier Transform (FFT) algorithm on each data segment.

Using this approach, the estimated impedance corresponds to the average value of the mechanical properties over the entire recording, implying the hidden assumption of stationarity of the mechanical properties of the respiratory system over this time. Impedance may change within a breath even in healthy subjects[7] but it may change markedly within a breath due to the presence of tidal expiratory flow limitation[8, 9]. There may also be large intra-tidal differences in  $Z_{rs}$  between breaths because of fluctuations in end-expiratory lung volume[10] and/or breathing pattern[11]. Therefore, different approaches for data processing

and interpretation are required in presence of these conditions. The so-called “within-breath analysis” uses data processing algorithms able to estimate  $Z_{rs}$  over very short time periods (i.e. over one or two oscillations), addresses this issue. This approach relies on forcing signals composed of fewer frequencies, which improves signal-to-noise ratio compared to signals with many frequency components, for the same total power of the signal[12]. In this case the impedance can be obtained from algorithms based on cross-correlation[11, 13], FFT [14, 15], or least squares[16] and their output is a time course of  $R_{rs}$  and  $X_{rs}$  over time (i.e.  $R(t)$  and  $X(t)$ , respectively) for one[11] or more[17] frequencies.

It has been demonstrated that these mathematical approaches are theoretically equivalent and that the choice of the algorithm used per se, does not affect the results[13]. Alternatively, implementation of such algorithms in the computer software may lead to different results due to variations in numerical processing and round-off errors across different hardware platforms. Therefore, these algorithms require extensive validation to establish the accuracy of the estimated impedance regardless of the mathematical approach used. The results of validations should also be transparent and freely available.

### **E1.1 Derivation of mean impedance parameters**

Once the  $Z_{rs}$  is derived from the raw pressure and flow data, it may be reported as either spectra of  $R_{rs}$  and  $X_{rs}$ , or that of modulus and phase as functions of frequency, or as functions of time at each specified frequency when the within-breath approaches are used. Even if these data are reported graphically, it is necessary to report specific indices to quantitatively characterize the results of the test.

When the analysis is in the frequency domain (spectra), the values should include at least the values of  $R_{rs}$  and  $X_{rs}$  at a frequency representative of the low-frequency spectra (typically 4 to 6Hz), of mid-frequency spectra (typically between 8 to 12Hz) and of higher frequency spectra (typically 18-30 Hz or higher). Resonant frequency is identified by interpolating  $X_{rs}(f)$  from oscillation frequencies adjacent to the ones at which  $X_{rs}$  changes from negative to positive values. In some systems, the area under the  $X_{rs}(f)$  curve from the lowest frequency to  $F_{res}$ , termed AX[18], is also reported. This index increases with disease[19-28], and is attractive since it uses all the reactance data from the lowest frequency to resonance. However, a but a standardized approach for measurement (starting frequency, frequency resolution and numerical integration method) is still lacking. Also, in some children or in severely obstructed patients,  $X_{rs}(f)$  may not cross zero in the frequency range employed by the device, in which case AX cannot be measured since the values of  $X_{rs}$  at higher frequencies cannot be reliably extrapolated. The methods of AX derivation should be described in reports/publications.

### **E1.2 Derivation of Intra-breath impedance parameters**

When within breath analysis is implemented,  $R_{rs}(t)$  and  $X_{rs}(t)$  can be divided into inspiratory and expiratory portions. Several parameters can be derived for both  $R_{rs}$  and  $X_{rs}$ , separately for inspiratory and expiratory phases of breathing. The parameters include the minimum, maximum, average, end-inspiratory and end-expiratory values of  $R_{rs}$  and of  $X_{rs}$ . Also, the differences between inspiratory and expiratory parameters have been described[8, 29, 30]. More recently,  $R_{rs}(t)$  and  $X_{rs}(t)$  were plotted against volume and against flow, and values such as the area of the  $R_{rs}$  or  $X_{rs}$  vs. volume loops were reported[9, 29, 31]. Intra-breath analysis therefore, allows measurement of the lung's dynamic behavior in relation to flow-dependence and volume-dependence. The rationale behind intra-breath analyses is that

airways diseases may affect  $R_{rs}$  and  $X_{rs}$  differently in inspiration and expiration, due to physiological asymmetry of lung mechanics. This asymmetry leads to phenomena happening during only specific breathing phases, such as expiratory flow limitation or airway closure. These differential mechanical responses during different parts of the respiratory cycle are exaggerated in disease due to for example, airway remodeling and alveolar dilation and destruction. More importantly, separation of  $R_{rs}$  and  $X_{rs}$  parameters into the inspiratory and expiratory phases potentially provides clinically useful information, over that of mean values, with potential for detailed characterization and phenotyping of airways and other lung diseases. This needs to be tested in clinical studies.

Different approaches for calculating impedance indices may result in different  $R_{rs}$  and  $X_{rs}$  values. To improve repeatability of results when the impedance is calculated over several breaths, a number of full breaths should be used i.e. data obtained from the start of inspiration to the end of expiration, instead of a constant time window, which could include partial tidal breaths[32]. This is because if the within-breath variations of  $R_{rs}$  and  $X_{rs}$  are large, inclusion of partial breaths at the start and end of the measurements may lead to variable results. For example, if the time window includes an extra inspiration in one test and an extra expiration in another, the number of inspiratory or expiratory segments within the recording will differ and may bias the results.

When within-breath approaches are used, manufacturers and users should specify the averaging process that is used. Averaging  $R_{rs}$  and  $X_{rs}$  data points from inspirations or expirations from all breaths is not equivalent to averaging data points from inspiration and expiration of each single breath and then averaging these for all breaths, as the duration of each breath is variable. Also, the different methods used to detect the beginning and the end

of a breath may lead to differences in results and therefore, the method used should be disclosed by manufacturers and users.

## Tables

**Table E1. Published reference values for Rrs and Zrs for children and adults.**

| Authors          | year | n   | ethnicity | age range (yrs) | setup    |
|------------------|------|-----|-----------|-----------------|----------|
| <i>Children</i>  |      |     |           |                 |          |
| <i>preschool</i> |      |     |           |                 |          |
| Hellinckx [33]   | 1998 | 247 | Cau       | 2-6             | IOS      |
| Malmberg [34]    | 2002 | 109 | Cau       | 2-7             | IOS      |
| Shackleton [35]  | 2013 | 584 | Mex       | 3-5             | i2M      |
| <i>school</i>    |      |     |           |                 |          |
| Frei [36]        | 2005 | 222 | Cau       | 2-10            | IOS      |
| Ducharme [37]    | 2005 | 197 | Cau       | 3-17            | Custovit |
| Dencker [38]     | 2006 | 360 | Cau       | 2-11            | IOS      |
| Amra [39]        | 2008 | 509 | Iranian   | 5-19            | IOS      |
| Vu [40]          | 2008 | 175 | Viet      | 6-11            | In-house |
| Nowowiejska [41] | 2008 | 626 | Cau       | 3-18            | IOS      |
| Hagiwara [42]    | 2013 | 537 | Jpn       | 6-15            | IOS      |
| Calogero [43]    | 2013 | 760 | Cau       | 2-13            | I2M      |

|                       |      |     |      |        |          |                                                                          |
|-----------------------|------|-----|------|--------|----------|--------------------------------------------------------------------------|
| Gochiocoa-Rangel [44] | 2015 | 283 | Mex  | 2-15   | IOS      | n:<br>num<br>ber<br>of<br>parti<br>cipa<br>nts;<br>Cau:<br>Cauc<br>asian |
| Kanokporn [45]        | 2017 | 233 | Thai | 3-7    | i2M      |                                                                          |
| AlBlooshi             | 2018 | 291 | UAE  | 4-12   | tremeFlo |                                                                          |
| <i>Adults</i>         |      |     |      |        |          |                                                                          |
| Landser [46]          | 1982 | 407 | Cau  | -      | In-house |                                                                          |
| Pasker [47]           | 1996 | 140 | Cau  | 21-81  | In-house |                                                                          |
| Guo [48]              | 2005 | 223 | Cau  | 65-100 | Oscilink |                                                                          |
| Brown [49]            | 2007 | 904 | Cau  | 18-92  | In-house |                                                                          |
| Oostveen [50]         | 2013 | 368 | Cau  | 18-84  | multi*   |                                                                          |
| Schulz [51]           | 2013 | 397 | Cau  | 45-91  | IOS      |                                                                          |
| Ribeiro [52]          | 2018 | 288 | Braz | 20-86  | In-house |                                                                          |

s; Mex: Mexicans; Jpn: Japanese; Viet: Vietnamese; UAE: United Arab Emarati. \*: IOS, I2M, Oscilink, 2 home-build setups. IOS: Impulse Oscillometry System.

**Table E2. Threshold values for bronchodilator response derived from healthy children.**

| Study                 | Age (yrs) | n*  | Drug (dose)             | Cut-off                       |
|-----------------------|-----------|-----|-------------------------|-------------------------------|
| Helinckx 1998 [33]    | 3-7       | 228 | Salbutamol<br>(200 µg)  | Rrs5: -41%                    |
| Nielsen 2001 [53]     | 2-6       | 37  | Terbutaline<br>(500 µg) | Rrs5: -29%, Xrs5: +42%        |
| Malmberg 2002<br>[34] | 2-7       | 89  | Salbutamol<br>(300 µg)  | Rrs5: -37%                    |
| Thamrin 2007 [54]     | 4-5       | 78  | Salbutamol<br>(600 µg)  | Rrs6: -42%, Xrs6: +61%        |
| Oostveen 2010 [55]    | 4         | 144 | Salbutamol<br>(200 µg)  | Rrs4: -43%, AX: +81%          |
| Calogero 2013 [43]    | 2-13      | 508 | Salbutamol              | Rrs6: -32%, Xrs8: +50%, AX: - |

(200 µg) 81%

\* n: the number of children who received bronchodilator

Bronchodilator response is defined as ((post-pre)/pre)\*100.

**Table E3. Threshold values for bronchodilator response derived from healthy adults.**

| Study                                 | n*  | Drug (dose)          | Cut-off                         |
|---------------------------------------|-----|----------------------|---------------------------------|
| Houghton 2004 (salbutamol 800µg) [56] | 12  | Salbutamol (800 µg)  | Rrs5: -16%, Xrs5: +27%          |
| Houghton 2005 (ipratropium) [57]      | 12  | Ipratropium (200 µg) | Rrs5: -23%, Xrs5: +19%          |
| Oostveen 2013 [50]                    | 368 | Salbutamol (400 µg)  | Rrs5: -32%, Xrs: +44%, AX: -65% |

\* n: the number of healthy adults who received bronchodilator

Bronchodilator response is defined as ((post-pre)/pre)\*100.

**Table E4. Studies comparing cut-offs during bronchial challenge testing using FOT vs spirometry.**

| Reference                 | Population                        | FOT device              | FOT cut-off                                         |
|---------------------------|-----------------------------------|-------------------------|-----------------------------------------------------|
| <b>Paediatric studies</b> |                                   |                         |                                                     |
| Lebecque 1987 [58]        | 17 children with AHR & 14 non-AHR | Oscillaire              | 50% increase R6 with histamine                      |
| Bouaziz 1996 [59]         | 38 asthmatic children             | Pulmosfor 4-32Hz or 6 & | 70% change R12 and 1 hPa.s.L <sup>-1</sup> decrease |



|                         |                                                              |                  |                                                                                                 |
|-------------------------|--------------------------------------------------------------|------------------|-------------------------------------------------------------------------------------------------|
|                         |                                                              | 12Hz             | in X12 with methacholine                                                                        |
| Jee 2010 [60]           | 50 asthmatic pre-school children & 41 children with cough    | IOS              | 80% decrease in X5 with methacholine                                                            |
| Bailly 2011[61]         | 227 children with suspected asthma                           | IOS              | 50% decrease X5 with methacholine                                                               |
| Schulze 2012 [62]       | 48 children                                                  | IOS              | 45% increase in R5 or 0.69 kPa.s.L <sup>-1</sup> decrease in X5 to methacholine                 |
| <b>Adult studies</b>    |                                                              |                  |                                                                                                 |
| van Noord 1989 [63]     | 53 adults                                                    | Custom device    | 47% increase in R5 detecting 15% decrease in FEV1 to histamine                                  |
| Hsuie 1993 [64]         | 141 adults (asthma, cough, psychogenic dyspnoea and healthy) | ?                | ?                                                                                               |
| J. Pairon 1994 [65]     | 119 adults with normal FEV1 from occupational screening.     | Custom device    | 65% increase in R0 with methacholine                                                            |
| A.B. Bohadana 1999 [66] | 71 adults with suspected asthma                              | Pulmosfor 4-32Hz | 0.060 %rise Rmean(4-32Hz)/µg carbachol (DRS) or 0.066 %rise R10/ µg carbachol                   |
| M. McClean 2011 [67]    | 52 asthmatic and 15 healthy adults                           | Custom device    | 27% decrease in Grs6 or 0.93 cm H <sub>2</sub> O.s.L <sup>-1</sup> decrease in X6 with mannitol |

IOS – impulse oscillometry system; R0, R5, R6, R10, R12, X5, X12 – respiratory system resistance at a specified oscillation frequency.

## Figures

Figure E1. Oscillometry traces showing examples of artefacts caused by (A) obstruction of the mouthpiece by the tongue, (B) swallows and (C) mouth leaks due to the lips not sealing around the mouth piece. Obstructions cause obvious changes in flow, perhaps with accompanying changes in the volume-time curves during breathing. Changes in flow and volume-time curves when leaks occur may be more subtle and difficult to detect by visual inspection.

Figure E2. Prediction equations of Rrs (left panel) and Xrs (right panel) at 5 or 6 Hz as a function of height from studies of preschool-age to adolescent children. The shaded grey panel in the right panel are the upper and lower limits of normal values of Rrs5 and Xrs5 in young adults according to Oostveen et al [50].

## References

1. Kaczka DW, Dellaca RL. Oscillation mechanics of the respiratory system: applications to lung disease. *Crit Rev Biomed Eng* 2011; 39(4): 337-359.
2. Cooley JW, Tukey JW. An Algorithm for the Machine Calculation of Complex Fourier Series. *Mathematics of Computation* 1965; 19(90): 297-301.
3. Allen JB. Estimation of transfer functions using the Fourier transform ratio method. *AIAA Journal* 1970; 8(3): 414-423.
4. Kaczka DW, Barnas GM, Suki B, Lutchen KR. Assessment of time-domain analyses for estimation of low-frequency respiratory mechanical properties and impedance spectra. *Ann Biomed Eng* 1995; 23(2): 135-151.
5. Kaczka DW, Ingenito EP, Lutchen KR. Technique to determine inspiratory impedance during mechanical ventilation: implications for flow-limited patients. *Annals of Biomedical Engineering* 1999; 27: 340-355.
6. Michaelson ED, Grassman ED, Peters WR. Pulmonary mechanics by spectral analysis of forced random noise. *J Clin Invest* 1975; 56(5): 1210-1230.
7. Davidson RN, Greig CA, Hussain A, Saunders KB. Within-breath changes of airway calibre in patients with airflow obstruction by continuous measurement of respiratory impedance. *British Journal of Diseases of the Chest* 1986; 80: 335-352.

8. Dellacà R, Santus P, Aliverti A, Stevenson N, Centanni S, Macklem PT, Pedotti A, Calverley PM, Respir J. Detection of expiratory flow limitation in COPD using the forced oscillation technique. *Eur Respir J* 2004; 23: 232-240.
9. Lorx A, Czövek D, Gingl Z, Mekan G, Radics B, Bartusek D, Szigeti S, Gál J, Losonczy G, Sly PD, Hantos Z. Airway dynamics in COPD patients by within-breath impedance tracking: effects of continuous positive airway pressure. *European Respiratory Journal* 2017; 49(2): 1601270.
10. Dellaca RL, Aliverti A, Lo Mauro A, Lutchen KR, Pedotti A, Suki B. Correlated Variability in the Breathing Pattern and End-Expiratory Lung Volumes in Conscious Humans. *PLoS One* 2015; 10(3): e0116317.
11. Peslin R, Ying Y, Gallina C, Duvivier C. Within-breath variations of forced oscillation resistance in healthy subjects. *European Respiratory Journal* 1992; 5(1): 86-92.
12. Oostveen E, MacLeod D, Lorino H, Farre R, Hantos Z, Desager K, Marchal F. The forced oscillation technique in clinical practice: methodology, recommendations and future developments. *Eur Respir J* 2003; 22(6): 1026-1041.
13. Horowitz JG, Siegel SD, Primiano FP, Chester EH. Computation of respiratory impedance from forced sinusoidal oscillations during breathing. *Computers and Biomedical Research* 1983; 16(6): 499-521.
14. Cauberghe M, Woestijne KPVd. Changes of respiratory input impedance during breathing in humans. *Journal of Applied Physiology* 1992; 73(6): 2355-2362.
15. Navajas D, Farré R, Rotger M, Badia R, Puig-de-Morales M, Montserrat JM. Assessment of Airflow Obstruction during CPAP by Means of Forced Oscillation in Patients with Sleep Apnea. *Am J Respir Crit Care Med* 1998; 157(5): 1526-1530.
16. Jensen A, Atileh H, Suki B, Ingenito EP, Lutchen KR. Selected Contribution: Airway caliber in healthy and asthmatic subjects: effects of bronchial challenge and deep inspirations. *Journal of Applied Physiology* 2001; 91(1): 506-515.
17. Dellacà R, Pompilio PP, Walker PP, Duffy N, Pedotti A, Calverley PM. Effect of bronchodilation on expiratory flow limitation and resting lung mechanics in COPD. *Eur Respir J* 2009; 33: 1329-1337.
18. Goldman MD. Clinical application of forced oscillation. *Pulm Pharmacol Ther* 2001; 14(5): 341-350.
19. Sugiyama A, Hattori N, Haruta Y, Nakamura I, Nakagawa M, Miyamoto S, Onari Y, Iwamoto H, Ishikawa N, Fujitaka K, Murai H, Kohno N. Characteristics of inspiratory and expiratory reactance in interstitial lung disease. *Respir Med* 2013; 107(6): 875-882.
20. Abe T, Setoguchi Y, Kono Y, Togashi Y, Sugiyama S, Tanakadate M, Soeda S, Nakai M, Sugiyama N, Fujiwara A, Yamaguchi K, Yamaguchi A, Kurita N. Effects of inhaled tiotropium plus transdermal tulobuterol versus tiotropium alone on impulse oscillation system (IOS)-assessed measures of peripheral airway resistance and reactance, lung function and quality of life in patients with COPD: a randomized crossover study. *Pulm Pharmacol Ther* 2011; 24(5): 617-624.
21. Aronsson D, Hesselstrand R, Bozovic G, Wuttge DM, Tufvesson E. Airway resistance and reactance are affected in systemic sclerosis. *Eur Clin Respir J* 2015; 2: 28667.
22. Hoshino M. Comparison of effectiveness in ciclesonide and fluticasone propionate on small airway function in mild asthma. *Allergol Int* 2010; 59(1): 59-66.
23. Shirai T, Mori K, Mikamo M, Shishido Y, Akita T, Morita S, Asada K, Fujii M, Suda T, Chida K. Respiratory mechanics and peripheral airway inflammation and dysfunction in asthma. *Clin Exp Allergy* 2013; 43(5): 521-526.
24. Tsuburai T, Suzuki S, Tsurikisawa N, Mitsui C, Higashi N, Fukutomi Y, Tanimoto H, Sekiya K, Oshikata C, Otomo M, Maeda Y, Taniguchi M, Ikehara K, Akiyama K. Use of

forced oscillation technique to detect airflow limitations in adult Japanese asthmatics.

*Arerugi* 2012; 61(2): 184-193.

25. Tsurikisawa N, Oshikata C, Tsuburai T, Asaji M, Saito N, Watai K, Kinoshita A, Sato Y, Fukuhara M, Minami T, Hayashi H, Tanimoto H, Ito J, Sekiya K, Otomo M, Maeda Y, Suzuki S, Akiyama K. Physiologic airway responses to inhaled histamine and acetylcholine in patients with mild asthma as analyzed by forced oscillation. *Arerugi* 2015; 64(7): 952-970.

26. Yamaguchi M, Niimi A, Ueda T, Takemura M, Matsuoka H, Jinnai M, Otsuka K, Oguma T, Takeda T, Ito I, Matsumoto H, Hirai T, Chin K, Mishima M. Effect of inhaled corticosteroids on small airways in asthma: investigation using impulse oscillometry. *Pulm Pharmacol Ther* 2009; 22(4): 326-332.

27. Shi Y, Aledia AS, Tatavoosian AV, Vijayalakshmi S, Galant SP, George SC. Relating small airways to asthma control by using impulse oscillometry in children. *Journal of Allergy and Clinical Immunology* 2012; 129(3): 671-678.

28. Oostveen E, Dom S, Desager K, Hagendorens M, De Backer W, Weyler J. Lung function and bronchodilator response in 4-year-old children with different wheezing phenotypes. *European Respiratory Journal* 2010; 35(4): 865-872.

29. Czövek D, Shackleton C, Hantos Z, Taylor K, Kumar A, Chacko A, Ware RS, Makan G, Radics B, Gingl Z, Sly PD. Tidal changes in respiratory resistance are sensitive indicators of airway obstruction in children. *Thorax* 2016; 71(10): 907-915.

30. Veiga J, Lopes AJ, Jansen JM, Melo PL. Within-breath analysis of respiratory mechanics in asthmatic patients by forced oscillation. *Clinics (Sao Paulo)* 2009; 64(7): 649-656.

31. Gray DM, Czovek D, McMillan L, Turkovic L, Stadler JAM, Vanker A, Radics BL, Gingl Z, Hall GL, Sly PD, Zar HJ, Hantos Z. Intra-breath measures of respiratory mechanics in healthy African infants detect risk of respiratory illness in early life. *European Respiratory Journal* 2018; 1800998.

32. Robinson PD, Turner M, Brown NJ, Salome C, Berend N, Marks GB, King GG. Procedures to improve the repeatability of forced oscillation measurements in school-aged children. *Respir Physiol Neurobiol* 2011; 177(2): 199-206.

33. Hellinckx J, De Boeck K, Bande-Knops J, van der Poel M, Demedts M. Bronchodilator response in 3-6.5 years old healthy and stable asthmatic children. *Eur Respir J* 1998; 12(2): 438-443.

34. Malmberg LP, Pelkonen A, Poussa T, Pohjanpalo A, Haahtela T, Turpeinen M. Determinants of respiratory system input impedance and bronchodilator response in healthy Finnish preschool children. *Clinical Physiology and Functional Imaging* 2002; 22(1): 64-71.

35. Shackleton C, Barraza-Villarreal A, Chen L, Gangell CL, Romieu I, Sly PD. Reference Ranges for Mexican Preschool-Aged Children Using the Forced Oscillation Technique. *Archivos de Bronconeumología (English Edition)* 2013.

36. Frei J, Jutla J, Kramer G, Hatzakis GE, Ducharme FM, Davis GM. Impulse Oscillometry: Reference values in children 100 to 150 cm in height and 3 to 10 years of age. *Chest* 2005; 128(3): 1266-1273.

37. Ducharme FM, Davis GM, Ducharme GR. Pediatric reference values for respiratory resistance measured by forced oscillation. *Chest* 1998; 113(5): 1322-1328.

38. Dencker M, Malmberg LP, Valind S, Thorsson O, Karlsson MK, Pelkonen A, Pohjanpalo A, Haahtela T, Turpeinen M, Wollmer P. Reference values for respiratory system impedance by using impulse oscillometry in children aged 2–11 years. *Clinical Physiology and Functional Imaging* 2006; 26(4): 247-250.

39. Amra B, Soltaninejad F, Golshan M. Respiratory resistance by impulse oscillometry in healthy Iranian children aged 5-19 years. *Iran J Allergy Asthma Immunol* 2008; 7(1): 25-29.

40. Vu LT, Demoulin B, Nguyen YT, Nguyen MT, Marchal F. Respiratory impedance and response to salbutamol in healthy Vietnamese children. *Pediatr Pulmonol* 2008; 43(10): 1013-1019.
41. Nowowiejska B, Tomalak W, Radliński J, Siergiejko G, Latawiec W, Kaczmarski M. Transient reference values for impulse oscillometry for children aged 3–18 years. *Pediatr Pulmonol* 2008; 43(12): 1193-1197.
42. Hagiwara S, Mochizuki H, Muramatsu R, Koyama H, Yagi H, Nishida Y, Kobayashi T, Sakamoto N, Takizawa T, Arakawa H. Reference values for Japanese children's respiratory resistance using the LMS method. *Allergol Int* 2014; 63(1): 113-119.
43. Calogero C, Simpson SJ, Lombardi E, Parri N, Cuomo B, Palumbo M, de Martino M, Shackleton C, Verheggen M, Gavidia T, Franklin PJ, Kusel MMH, Park J, Sly PD, Hall GL. Respiratory impedance and bronchodilator responsiveness in healthy children aged 2–13 years. *Pediatr Pulmonol* 2013; 48(7): 707-715.
44. Gochicoa-Rangel L, Torre-Bouscoulet L, Martinez-Briseno D, Rodriguez-Moreno L, Cantu-Gonzalez G, Vargas MH. Values of impulse oscillometry in healthy mexican children and adolescents. *Respir Care* 2015; 60(1): 119-127.
45. Kanokporn U, Wichuta S, Akarin N, Chulaluk K. Respiratory Impedance Reference Values for Forced Oscillation Technique Predicted by Arm Span and Height in Thai Preschool Children. *Pediatric Allergy, Immunology, and Pulmonology* 2017; 30(2): 97-102.
46. Landser FJ, Clement J, Van de Woestijne KP. Normal values of total respiratory resistance and reactance determined by forced oscillations: influence of smoking. *Chest* 1982; 81(5): 586-591.
47. Pasker HG, Schepers R, Clement J, Van de Woestijne KP. Total respiratory impedance measured by means of the forced oscillation technique in subjects with and without respiratory complaints. *Eur Respir J* 1996; 9(1): 131-139.
48. Guo YF, Herrmann F, Michel J-P, Janssens J-P. Normal values for respiratory resistance using forced oscillation in subjects >65 years old. *European Respiratory Journal* 2005; 26(4): 602-608.
49. Brown NJ, Xuan W, Salome CM, Berend N, Hunter ML, Musk AW, James AL, King GG. Reference equations for respiratory system resistance and reactance in adults. *Respir Physiol Neurobiol* 2010; 172(3): 162-168.
50. Oostveen E, Boda K, van der Grinten CP, James AL, Young S, Nieland H, Hantos Z. Respiratory impedance in healthy subjects: baseline values and bronchodilator response. *Eur Respir J* 2013; 42(6): 1513-1523.
51. Schulz H, Flexeder C, Behr J, Heier M, Holle R, Huber R, Jorres R, Nowak D, Peters A, Wichmann H-E, Heinrich J, Karrasch S. Reference Values of Impulse Oscillometric Lung Function Indices in Adults of Advanced Age. *PLoS One* 2013; 8(5): e63366.
52. Ribeiro FCV, Lopes AJ, Melo PL. Reference values for respiratory impedance measured by the forced oscillation technique in adult men and women. *Clin Respir J* 2018: in press.
53. Nielsen KG, Bisgaard H. Discriminative capacity of bronchodilator response measured with three different lung function techniques in asthmatic and healthy children aged 2 to 5 years. *Am J Respir Crit Care Med* 2001; 164: 554-559.
54. Thamrin C, Gangell CL, Udomittipong K, Kusel MMH, Patterson H, Fukushima T, Schultz A, Hall GL, Stick SM, Sly PD. Assessment of bronchodilator responsiveness in preschool children using forced oscillations. *Thorax* 2007; 62(9): 814-819.
55. Oostveen E, Dom S, Desager K, Hagendorens M, Backer W, Weyler J, Respir J. Lung function and bronchodilator response in 4-year-old children with different wheezing phenotypes. *Eur Respir J* 2010; 35: 865-872.

56. Houghton CM, Woodcock AA, Singh D. A comparison of lung function methods for assessing dose-response effects of salbutamol. *British Journal of Clinical Pharmacology* 2004; 58(2): 134-141.
57. Houghton CM, Woodcock AA, Singh D. A comparison of plethysmography, spirometry and oscillometry for assessing the pulmonary effects of inhaled ipratropium bromide in healthy subjects and patients with asthma. *British Journal of Clinical Pharmacology* 2005; 59(2): 152-159.
58. Lebecque P, Spier S, Lapierre JG, Lamarre A, Zinman R, Coates AL. Histamine challenge test in children using forced oscillation to measure total respiratory resistance. *Chest* 1987; 92(2): 313-318.
59. Bouaziz N, Beyaert C, Gauthier R, Monin P, Peslin R, Marchal F. Respiratory system reactance as an indicator of the intrathoracic airway response to methacholine in children. *Pediatr Pulmonol* 1996; 22(1): 7-13.
60. Jee HM, Kwak JH, Jung DW, Han MY. Useful Parameters of Bronchial Hyperresponsiveness Measured with an Impulse Oscillation Technique in Preschool Children. *Journal of Asthma* 2010; 47(3): 227-232.
61. Bailly C, Crenesse D, Albertini M. Evaluation of impulse oscillometry during bronchial challenge testing in children. *Pediatr Pulmonol* 2011; 46(12): 1209-1214.
62. Schulze J, Smith H-J, Fuchs J, Herrmann E, Dressler M, Rose MA, Zielen S. Methacholine challenge in young children as evaluated by spirometry and impulse oscillometry. *Respir Med* 2012; 106(5): 627-634.
63. van Noord JA, Clement J, van de Woestijne KP, Demedts M. Total respiratory resistance and reactance as a measurement of response to bronchial challenge with histamine. *American Review of Respiratory Disease* 1989; 139(4): 921-926.
64. Hsiue TR, Hsieh AL, Chang HY, Chen CR, Chen CW. Bronchoprovocation test by forced oscillation technique: airway hyperresponsiveness in chronic cough and psychogenic dyspnea subjects. *Journal of the Formosan Medical Association* 1993; 92(3): 231-236.
65. Pairen J, Iwatsubo Y, Hubert C, Lorino H, Nouaigui H, Gharbi R, Brochard P. Measurement of bronchial responsiveness by forced oscillation technique in occupational epidemiology. *European Respiratory Journal* 1994; 7(3): 484-489.
66. Bohadana AB, Peslin R, Megherbi SE, Teculescu D, Sauleau EA, Wild P, Pham QT. Dose-response slope of forced oscillation and forced expiratory parameters in bronchial challenge testing. *Eur Respir J* 1999; 13(2): 295-300.
67. McClean MA, Htun C, King GG, Berend N, Salome CM. Cut-points for response to mannitol challenges using the forced oscillation technique. *Respir Med* 2011; 105(4): 533-540.
