# Supplementary material
Source: HighWire-hosted journal article supplement (https://erj.ersjournals.com/content/55/2/1900753)
Supplement: inline-supplementary-material-4 [file inline-supplementary-material-4.pdf]

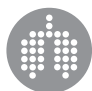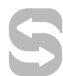

SHAREABLE PDF

# Technical standards for respiratory oscillometry

Gregory G. King<sup>1</sup>, Jason Bates<sup>2</sup>, Kenneth I. Berger<sup>3</sup>, Peter Calverley<sup>4</sup>, Pedro L. de Melo <sup>5</sup>, Raffaele L. Dellacà <sup>6</sup>, Ramon Farré<sup>7,8</sup>, Graham L. Hall<sup>9</sup>, Iulia Ioan <sup>10,11</sup>, Charles G. Irvin<sup>2</sup>, David W. Kaczka <sup>12</sup>, David A. Kaminsky<sup>2</sup>, Hajime Kurosawa<sup>13</sup>, Enrico Lombardi<sup>14</sup>, Geoffrey N. Maksym <sup>15</sup>, François Marchal<sup>10,11</sup>, Beno W. Oppenheimer<sup>3</sup>, Shannon J. Simpson<sup>9</sup>, Cindy Thamrin <sup>1</sup>, Maarten van den Berge<sup>16</sup> and Ellie Oostveen<sup>17</sup>

**Affiliations:** <sup>1</sup>Dept of Respiratory Medicine and Airway Physiology and Imaging Group, Royal North Shore Hospital and The Woolcock Institute of Medical Research, The University of Sydney, Sydney, Australia. <sup>2</sup>Dept of Medicine, Pulmonary/Critical Care Division, University of Vermont, Larner College of Medicine, Burlington, VT, USA. <sup>3</sup>Division of Pulmonary, Critical Care, and Sleep Medicine, NYU School of Medicine and André Cournand Pulmonary Physiology Laboratory, Bellevue Hospital, New York, NY, USA. <sup>4</sup>Institute of Ageing and Chronic Disease, University of Liverpool, Liverpool, UK. <sup>5</sup>Institute of Biology and Faculty of Engineering, Department of Physiology, Biomedical Instrumentation Laboratory, State University of Rio de Janeiro, Rio de Janeiro, Brazil. <sup>6</sup>Dipartimento di Elettronica, Informazione e Bioingegneria – DEIB, Politecnico di Milano University, Milano, Italy. <sup>7</sup>Unitat de Biofísica i Bioenginyeria, Facultat de Medicina, Universitat de Barcelona-IDIBAPS, Barcelona, Spain. <sup>8</sup>CIBER de Enfermedades Respiratorias, Madrid, Spain. <sup>9</sup>Children's Lung Health, Telethon Kids Institute, School of Physiotherapy and Exercise Science, Curtin University, Perth, Australia. <sup>10</sup>Dept of Pediatric Lung Function Testing, Children's Hospital, Vandoeuvre-lès-Nancy, France. <sup>11</sup>EA 3450 DevAH – Laboratory of Physiology, Faculty of Medicine, University of Lorraine, Vandoeuvre-lès-Nancy, France. <sup>12</sup>Depts of Anesthesia, Biomedical Engineering and Radiology, University of Iowa, Iowa City, IA, USA. <sup>13</sup>Dept of Occupational Health, Tohoku University School of Medicine, Sendai, Japan. <sup>14</sup>Pediatric Pulmonary Unit, Meyer Pediatric University Hospital, Florence, Italy. <sup>15</sup>School of Biomedical Engineering, Dalhousie University, Halifax, NS, Canada. <sup>16</sup>University of Groningen, University Medical Center Groningen, Dept of Pulmonary Diseases, Groningen, The Netherlands. <sup>17</sup>Dept of Respiratory Medicine, Antwerp University Hospital and University of Antwerp, Antwerp, Belgium.

**Correspondence:** Gregory G. King, Sydney University, The Woolcock Institute of Medical Research, 431 Glebe Point Rd, Glebe, NSW 2037, Australia. E-mail: gkg@woolcock.org.au

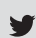

@ERSpublications

**With increasing clinical and research use of oscillometric measurements of respiratory system resistance and reactance, an update to the 2003 technical standards has been developed by an ERS task force of international experts** <http://bit.ly/2XBJ7PF>

**Cite this article as:** King GG, Bates J, Berger KI, *et al.* Technical standards for respiratory oscillometry. *Eur Respir J* 2020; 55: 1900753 [<https://doi.org/10.1183/13993003.00753-2019>].

This single-page version can be shared freely online.

**ABSTRACT** Oscillometry (also known as the forced oscillation technique) measures the mechanical properties of the respiratory system (upper and intrathoracic airways, lung tissue and chest wall) during quiet tidal breathing, by the application of an oscillating pressure signal (input or forcing signal), most commonly at the mouth. With increased clinical and research use, it is critical that all technical details of the hardware design, signal processing and analyses, and testing protocols are transparent and clearly reported to allow standardisation, comparison and replication of clinical and research studies. Because of this need, an update of the 2003 European Respiratory Society (ERS) technical standards document was produced by an ERS task force of experts who are active in clinical oscillometry research.

The aim of the task force was to provide technical recommendations regarding oscillometry measurement including hardware, software, testing protocols and quality control.

The main changes in this update, compared with the 2003 ERS task force document are 1) new quality control procedures which reflect use of “within-breath” analysis, and methods of handling artefacts; 2) recommendation to disclose signal processing, quality control, artefact handling and breathing protocols (e.g. number and duration of acquisitions) in reports and publications to allow comparability and replication between devices and laboratories; 3) a summary review of new data to support threshold values for bronchodilator and bronchial challenge tests; and 4) updated list of predicted impedance values in adults and children.
